# Supplementary material for: Thermal degradation and flame retardancy of nylon 6/aluminum methylmethoxy phosphonate composites
Source: Royal Society of Chemistry journal article supplement (doi:10.1039/d2ra07297a), 2023-01-01
Supplement: d2ra07297a1.pdf [file d2ra07297a1.pdf]

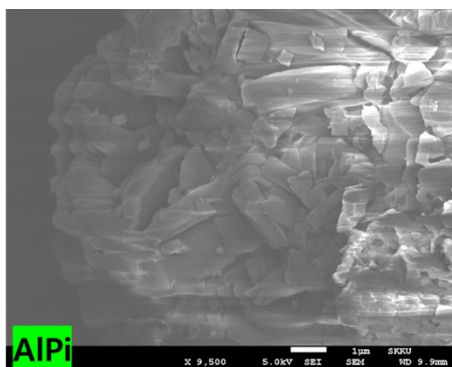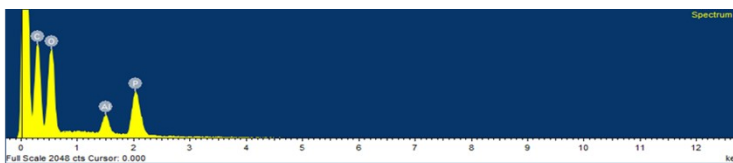

| Element | Weight% | Atomic% |
|---------|---------|---------|
| C K     | 39.09   | 53.13   |
| O K     | 29.07   | 29.67   |
| Al K    | 5.47    | 3.31    |
| P K     | 26.36   | 13.89   |
| Totals  | 100.00  |         |

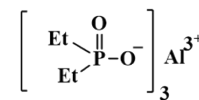

Aluminum Diethyl Phosphinate  
 P, 23.81; Al, 6.91

➤ Micro size with rod-shape

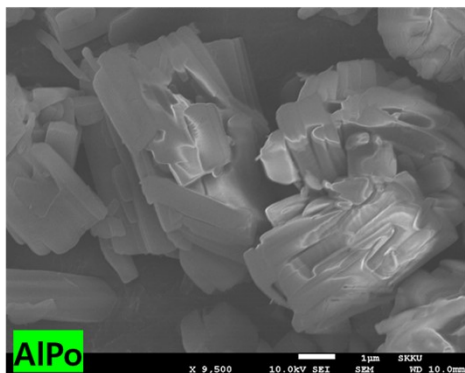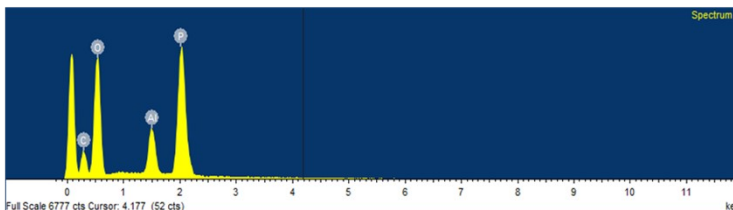

| Element | Weight% | Atomic% |
|---------|---------|---------|
| C K     | 23.41   | 33.93   |
| O K     | 42.78   | 46.55   |
| Al K    | 6.24    | 4.03    |
| P K     | 27.57   | 15.49   |
| Totals  | 100.00  |         |

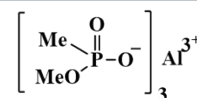

Aluminum Methyl Methoxy Phosphonate  
 P, 26.24; Al, 7.62

➤ Micro size with rod-shape

S1: SEM and EDS of FRs

- a. UL-94 test of Pristine PA6  
<https://youtube.com/shorts/lzpzUPymQu4>
- b. UL-94 test of PA6/AIPi (15wt%)  
[https://youtube.com/shorts/latmbbu9\\_Is](https://youtube.com/shorts/latmbbu9_Is)
- c. UL-94 test of PA6/AIPo (15wt%)  
<https://youtube.com/shorts/hzKI8vshBsg>
- d. UL-94 test of PA6/AIPo (20wt%)  
<https://youtube.com/shorts/MKjpmNuDQxQ>

S2: videos of UL-94 test

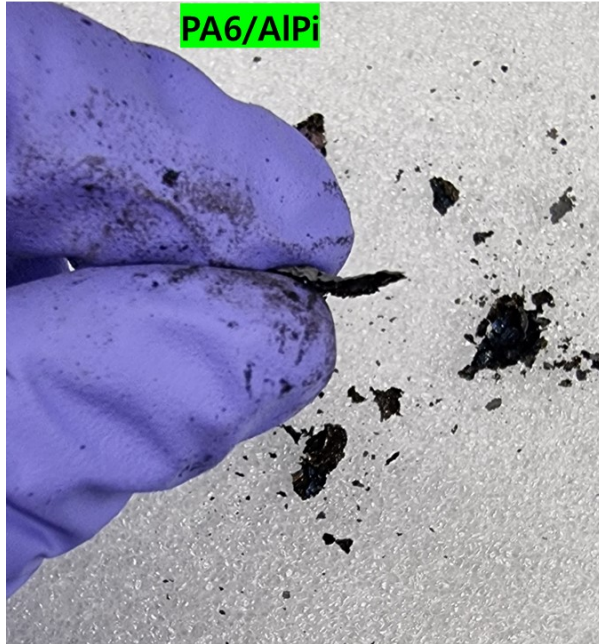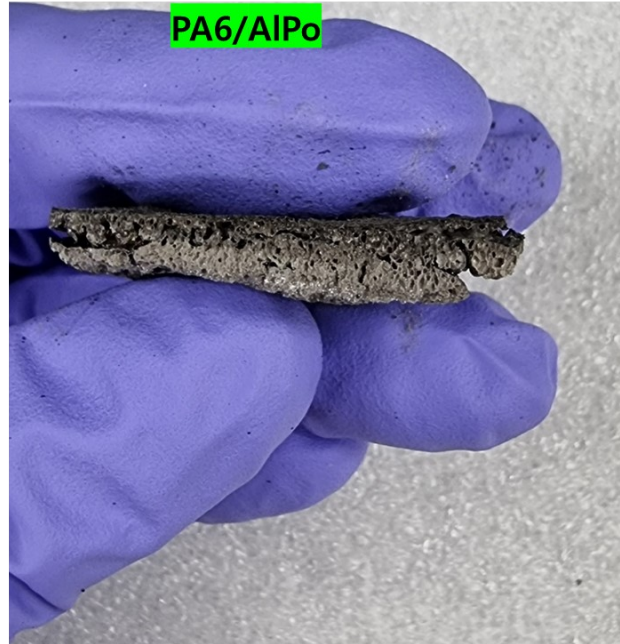

S3: pictures of char after cone calorimeter
